1 **Overexpression of ELOVL6 has been associated with**  
2 **poor prognosis in patients with head and neck**  
3 **squamous cell carcinoma**

4 **Ruoya Wang<sup>1\*</sup>**

5 <sup>1</sup>Department of Otolaryngology, Head and Neck Surgery, First Affiliate Hospital of  
6 Jinzhou Medical University

7

8 <sup>1</sup>Current address: Department of Otolaryngology, Head and Neck Surgery, First  
9 Affiliate Hospital of Jinzhou Medical University, Jinzhou, Liaoning, People's Republic  
10 of China

11

12 **\*Corresponding author:** Ruoya Wang

13 **E-mail:** [wangruoya1@163.com](mailto:wangruoya1@163.com)

14

15 **Acknowledgements:** I thank MedSci for language editing the manuscript draft.

16

17

18

19

20

21

## 22 **Abstract**

23 Head and neck squamous cell carcinoma (HNSCC) is a high mortality disease.  
24 Extension of long-chain fatty acid family member 6 (ELOVL6) is a key enzyme  
25 involved in fat formation that catalyzes the elongation of saturated and  
26 monounsaturated fatty acids. Overexpression of ELOVL6 has been associated with  
27 obesity-related malignancies, including hepatocellular carcinoma, breast, colon,  
28 prostate, and pancreatic cancer. The following study investigated the role of ELOVL6  
29 in HNSCC patients. Gene expression and clinicopathological analysis, enrichment  
30 analysis, and immune infiltration analysis were based on the Gene Expression  
31 Omnibus (GEO) and the Cancer Genome Atlas (TCGA), with additional bioinformatics  
32 analyses. The statistical analysis was conducted in R, and TIMER was used to  
33 analyze the immune response of ELOVL6 expression in HNSCC. The expression of  
34 ELOVL6 was related to tumor grade. Survival analysis showed that patients with high  
35 expression of ELOVL6 had a poor prognosis. Moreover, the results of GSEA  
36 enrichment analysis showed that ELOVL6 affects the occurrence of HNSCC through  
37 fatty acid metabolism, biosynthesis of unsaturated fatty acids, and other pathways.  
38 Finally, ELOVL6 verified by the Human Protein Atlas (HPA) database were consistent  
39 with the mRNA levels in HNSCC samples. ELOVL6 is a new biomarker for HNSCC  
40 that may be used as a potential predictor of the prognosis of human HNSCC.

41 **Keywords:** HNSCC, ELOVL6, GEO, TCGA, GSEA, Prognosis

42

43

## 44 **Introduction**

45 Head and neck squamous cell carcinoma (HNSCC) is an aggressive epithelial  
46 malignancy worldwide, usually classified in tobacco-related HNSCC and human  
47 papillomavirus (HPV)-positive HNSCC. More than 650,000 new cases and 330,000  
48 deaths were reported in 2018(1). Despite technological advances, which have  
49 promoted early detection and timely intervention, clinical outcomes and long-term  
50 survival rates in HNSCC patients have not improved; the 5-year survival rate remains  
51 around 50 percent (2, 3), while the median survival rate of patients with recurrent or  
52 metastatic disease is approx.10 months. The high mortality is associated with a high  
53 rate of late diagnosis, and the survival rate of late patients is only 34.9 percent(4).  
54 Radiotherapy, surgery, and chemotherapy have been considered as the main  
55 treatment approaches. Although HNSCC is treated in a variety of ways, patients still  
56 have a lower survival probability. Therefore, the discovery of sensitive HNSCC  
57 biomarkers remains crucial.

58 Extension of long-chain fatty acid family member 6 (ELOVL6) is part of a highly  
59 conserved endoplasmic reticulum family involved in long-chain fatty acid formation.  
60 ELOVL6 catalyzes the elongation of saturated and monounsaturated fatty acids with  
61 12, 14, and 16 carbon atoms to 18 carbon fatty acids (5). ELOVL6 is commonly  
62 expressed in high-fat tissues, such as the liver, brown and white adipose tissue, and  
63 the brain (6, 7). ELOVL6 up-regulation is involved in insulin resistance. Moreover,  
64 ELOVL6 has been associated with obesity-related malignancies, including  
65 hepatocellular carcinoma (5), breast, colon, prostate, and pancreatic cancer (8-10).  
66 Yet, its role in HNSCC progression remains unclear.

67 In this work, we used microarray data obtained from the TCGA and GEO  
68 database to investigate the expression of ELOVL6 in HNSCC samples. We used R  
69 (3.6.3 version) to examine the association of ELOVL6 expression with certain clinical  
70 parameters and the prognosis of patients with HNSCC. To better understand the  
71 biological processes associated with ELOVL6 regulatory networks, which may be the  
72 basis for head and neck squamous cell carcinogenesis, we performed gene set  
73 enrichment analysis (GSEA) and Kyoto Encyclopedia of Genes and Genomes (KEGG)  
74 analysis. We also used TIMER to detect the association of ELOVL6 with  
75 tumor-infiltrating immune cells (TIICs). Besides, we analyzed the correlation between  
76 ELOVL6 and HNSCC and the role of ELOVL6 in the occurrence and development of  
77 HNSCC.

## 78 **Material and methods**

### 79 **Evidence from TCGA database**

80 Data on gene expression were obtained from the GEO  
81 (<https://www.ncbi.nlm.nih.gov/gds>). Moreover, additional data on gene expression,  
82 immune system infiltration (workflow type: HTSeqFPKM), and related clinical  
83 information (Data type: Clinical Supplement) were obtained from the TCGA database  
84 of HNSCC (<https://portal.gdc.cancer.gov/>). The clinical factors included gender, stage,  
85 age, grade, T-phase, M-phase, N-phase, survival status, and a number of days of  
86 survival. We retained RNA-Seq and clinical data for further studies. In addition, R  
87 (3.6.3 version) and R BioConductor software packages were used for data analysis.  
88 Our study was in accordance with the publication guidelines provided by TCGA.

## 89 **Gene enrichment analysis**

90 GSEA was performed using normalized RNA-Seq data obtained from TCGA(11).  
91 The number of permutations was set to 1,000. KEGG pathways were analyzed using  
92 GSEA to investigate possible biological functions of ELOVL6. Enrichment results had  
93 to satisfy one condition, a nominal p-value<0.05. The GSEA created a list of all gene  
94 permutations associated with ELOVL6 expression. The samples were then divided  
95 into high ELOVL6 groups and low ELOVL6 groups as training sets to distinguish  
96 potential functions; GSEA was used to elucidate obvious survival differences. Multiple  
97 genome substitutions were performed for each test by the degree of ELOVL6  
98 expression as phenotypic markers. Normalized enrichment scores (NES) and nominal  
99 P-values were used to classify the enrichment pathways in each phenotype.

## 100 **Immune infiltrates analysis**

101 The potential relationship between ELOVL6 expression and TIICs was evaluated  
102 using timer-related modules. TIMER is a comprehensive resource for systematic  
103 analysis of immune infiltration in different cancer types  
104 (<https://cistrome.shinyapps.io/timer/>)(12), which relies on a recently published  
105 statistical method, deconvolution, to infer TIIC prevalence from gene expression  
106 profiles (13). To approximate TIIC abundance, the TIMER database used TCGA data  
107 from 10,897 samples of 32 cancers. We examined the expression of ELOVL6 in  
108 HNSCC and its relevance to the abundance of TIICs (including B cells, CD8+ T cells,

109 CD4+ T cells, macrophages, neutrophils, and dendritic cells) through gene modules.

110 TIMER produced a graph illustrating gene expression levels against tumor purity(14).

## 111 **Data validation**

112 The human protein atlas database (HPA) ([www.proteinatlas.org](http://www.proteinatlas.org)) was used to  
113 analyze the protein expression of ELOVL6 between normal and head and neck  
114 squamous cell carcinoma tissues. The HPA provides access to 32 human tissues and  
115 their protein expression profiles and uses antibody profiling to accurately assess  
116 protein localization. Additionally, the HPA provides measurements of RNA levels(15).

## 117 **Statistical analysis**

118 All statistical analyses were carried out using R (version 3.6.3). To calculate 95%  
119 CI and HR, we used the univariate and multivariate models for Cox analysis. Logistic  
120 regression, Wilcoxon rank-sum test, and Kruskal test were used to analyze the  
121 correlation between clinical features and ELOVL6 expression. Single-factor survival  
122 analysis was used to compare the relationship between several clinical characteristics  
123 and survival rates. Using multivariate Cox analysis, we assessed the expression of  
124 ELOVL6 and the effects of other pathological and clinical factors (sex, age, grade,  
125 lymph node, distant metastasis, tumor status, and stage) on overall survival (OS). The  
126 P-value>0.05 expressed by ELOVL6 was set as the threshold.

## 127 **Results**

### 128 **Analysis of survival outcomes and variables**

129 Four HNSCC-related gene expression profiling datasets, including GSE30784,  
130 GSE23036, GSE33205, and GSE59102, were obtained directly from the GEO  
131 website. GSE30784 consists of 44 normal tissues, 167 cancer tissue samples, and 17  
132 dysplasia tissue samples, among which 17 samples of abnormal tissues were  
133 removed. The data were generated using the GPL570 platform. GSE23036 consists  
134 of five normal tissues and 63 cancer tissue samples using the GPL571 platform;  
135 GSE33205 consists of 25 normal tissue samples and 44 cancer tissue samples. The  
136 data were generated using the GPL05175-3188 platform. GSE59102 consists of 13  
137 adjacent tissues and 29 cancer tissue samples using the GPL6480-9577 platform.

138 We divided the four data sets into two groups: GSE30784 was included in the first  
139 group, GSE23036, GSE33205, and GSE59102 in the second group. The second data  
140 group was integrated after batch correction.

141 The results of the two groups were consistent. A significant difference in ELOVL6  
142 expression ( $P < 0.01$ ) was found between normal, and tumor tissues; ELOVL6 was  
143 highly expressed in tumor tissue (Fig 1A, B).

144 We then selected 502 tumor samples of HNSCC in the TCGA database. First, we  
145 converted the file to alter the count data to more similar values to those obtained from  
146 the microarray. Survival analysis indicated that HNSCC with high ELOVL6 expression  
147 had a worse prognosis than a tumor with low expression of ELOVL6 ( $P < 0.0$ ; Fig 1C).

148 Next, we assessed the association between ELOVL6 expression levels with  
149 various clinicopathological parameters in patients with HNSCC. The expression of

150 ELOVL6 was found to be significantly correlated with the tumor tissue grade ( $P < 0.01$ ;  
151 Fig 1D).

152 **Fig.1 ELOVL6 expression and the association among clinicopathologic factors.**

153 (A) The scatter plot showed the difference of ELOVL6 expression between normal  
154 and tumor samples in GSE30784 ( $P < 0.01$ ). (B) The scatter plot showing the  
155 difference of ELOVL6 expression between normal and tumor samples in GSE23036,  
156 GSE33205 and GSE59102 ( $P < 0.01$ ); (C) Survival Analysis of ELOVL6 High and Low  
157 Expressions in TCGA ( $P < 0.01$ ); (D) Expression of ELOVL6 correlated significantly  
158 with histological grade in TCGA ( $P < 0.01$ ).

159 Univariate Logistic regression analysis showed that the expression of ELOVL6 as  
160 a well-defined ward variable was related to clinicopathological factors with poor  
161 prognosis. The expression of ELOVL6 in HNSCC was significantly correlated with  
162 grade (OR=4.4, 95%CI 1.65~12.41, G1 vs. G3). These results suggest that  
163 HNSCC patients with high ELOVL6 expression are more likely to develop high-grade  
164 tumor (Table 1).

165 **Table 1. ELOVL6 expression associated with clinical-pathological characteristics (logistic**  
166 **regression)**

| Clinical characteristics | Total(N) | Odds ratio in CENPM expression | P-value |
|--------------------------|----------|--------------------------------|---------|
| age (> 65 vs. ≤ 65)      | 499      | 0.78(0.53-1.12)                | 0.187   |
| Gender (female vs. male) | 500      | 1.10(0.74-1.64)                | 0.612   |
| Grade (G1 vs. G2)        | 171      | 2.11(0.92-5.09)                | 0.08    |
| Grade (G1 vs. G3)        | 171      | 4.4(1.65-12.41)                | 0.003*  |
| Stage (I vs. IV)         | 432      | 1.68 ( 0.73-4.00 )             | 0.22    |

167 The categorical dependent variable, greater or less than the median expression level

168 **Relationship between ELOVL6 expression and**  
169 **clinicopathology**



170 Cox analysis was used to explore the relationship between ELOVL6 expression  
171 and OS and other variable characteristics in patients with HNSCC. Single-factor  
172 correlation analysis indicated that stage (HR =1.904, p<0.01), T-phase (HR  
173 =1.499, p<0.01), M-phase (HR =20.531, p<0.01), N-phase (HR =1.795,  
174 p<0.001), and ELOVL6 mRNA expression (HR=1.457, p<0.01) were significantly  
175 correlated with OS. Our multivariate analysis (Fig 2) revealed that ELOVL6  
176 expression (HR=1.39, P=0.015), T-phase (HR=1.70, P=0.017), M-phase  
177 (HR=13.16, P=0.021), N-phase (HR=1.93, P=0.000) were independent  
178 prognostic factors in patients with HNSCC (Table 2).

179 **Fig.2. Multivariate Cox analysis of ELOVL6 expression and other**  
180 **clinicopathological variables.**

**Table 2. Correlation between overall survival and multivariable characteristics in TCGA patients via Cox regression and Multivariate survival model**

| Parameter | Univariate analysis |             |             | Multivariate analysis |             |          |
|-----------|---------------------|-------------|-------------|-----------------------|-------------|----------|
|           | HR                  | 95%CI       | P           | HR                    | 95%CI       | P        |
| Age       | 1.01                | 0.98-1.03   | 0.286       | 1.00                  | 0.98-1.03   | 0.443    |
| Gender    | 0.64                | 0.36-1.14   | 0.133       | 0.62                  | 0.34-1.12   | 0.116    |
| Grade     | 1.47                | 0.98-2.22   | 0.062       | 1.37                  | 0.84-2.24   | 0.203    |
| Stage     | 1.90                | 1.23-2.92   | 0.003**     | 0.73                  | 0.37-1.45   | 0.379    |
| T         | 1.49                | 1.13-1.98   | 0.004**     | 1.70                  | 1.09-2.63   | 0.017*   |
| M         | 20.53               | 2.56-164.16 | 0.004**     | 13.16                 | 1.45-119.14 | 0.021*   |
| N         | 1.79                | 1.34-2.39   | 7.19E-05*** | 1.93                  | 1.37-2.72   | 0.000*** |
| ELOVL6    | 1.45                | 1.12-1.88   | 0.004**     | 1.39                  | 1.06-1.82   | 0.015*   |

P-value significant codes: 0 ≤ \*\*\* < 0.001 ≤ \*\* < 0.01 ≤ \* < 0.05

## 181 **Analysis of ELOVL6 using GSEA**

182 GSEA was used to explore the potential biological functions of ELOVL6 through  
183 KEGG pathway analysis. Significant differences in the enrichment of high levels of  
184 ELOVL6 in KEGG pathways were found (p<0.050). According to the Normalized

185 enrichment score (NES), highly enriched signaling pathways were selected. KEGG  
186 pathway enrichment analysis revealed nine categories positively associated with high  
187 levels of ELOVL6, as shown in Table 3: fatty acid metabolism, biosynthesis of  
188 unsaturated fatty acids, certain cancer, WNT signaling pathway, RNA degradation,  
189 cell cycle, insulin signaling pathway, and tight junction. The results showed that  
190 ELOVL6 high expression differentially enriched fatty acid metabolism, biosynthesis of  
191 unsaturated fatty acids, certain cancer, WNT signaling pathway, RNA degradation,  
192 cell cycle, insulin signaling pathway, and tight junction (Fig 3).

193 **Fig. 3. Enrichment plots from gene set enrichment analysis (GSEA)**

**Table 3. Gene Sets Enriched in Phenotype High**

| Gene set name                                | Size | NES       | NOM P-value |
|----------------------------------------------|------|-----------|-------------|
| KEGG_FATTY_ACID_METABOLISM                   | 42   | 1.5619199 | 0.045816734 |
| KEGG_WNT_SIGNALING_PATHWAY                   | 150  | 1.4809166 | 0.022357723 |
| KEGG_BIOSYNTHESIS_OF_UNSATURATED_FATTY_ACIDS | 22   | 1.595327  | 0.04296875  |
| KEGG_RNA_DEGRADATION                         | 57   | 1.5997431 | 0.013806706 |
| KEGG_CELL_CYCLE                              | 124  | 1.6361903 | 0.045009784 |
| KEGG_INSULIN_SIGNALING_PATHWAY               | 137  | 1.5313097 | 0.022044089 |
| KEGG_FATTY_ACID_METABOLISM                   | 42   | 1.5619199 | 0.045816734 |
| KEGG_CHRONIC_MYELOID_LEUKEMIA                | 73   | 1.5339031 | 0.041749503 |
| KEGG_COLORECTAL_CANCER                       | 62   | 1.4757243 | 0.04828974  |
| KEGG_TIGHT_JUNCTION                          | 132  | 1.472029  | 0.048625793 |

NES: normalized enrichment score; NOM: nominal. Gene sets with NOM P-value<0.05 is considered as significant

194 Independent tumor-infiltrating lymphocytes have an essential role in predicting  
195 overall survival and sentinel lymph node status(16). Therefore, in this study, we used  
196 TIMER to analyze the possible correlation between ELOVL6 expression and immune  
197 infiltration level in HNSCC. ELOVL6 expression was positively correlated with B cells  
198 ( $p=3.72e-01$ ), CD8+ T cells ( $p=1.48e-01$ ), CD4+ T cells ( $p=2.92e-02$ ),  
199 macrophages ( $p=1.07e-01$ ), dendritic cells ( $p=2.43e-01$ ) and negatively correlated

200 with neutrophils ( $p=5.04e-01$ ), as shown in (Fig 4A). These results suggest that  
201 ELOVL6 has a key role in the immune invasion of HNSCC.

202 **Fig. 4 (A) Correlations between ELOVL6 expression and immune infiltration levels.**  
203 **(B) Immunohistochemistry of ELOVL6 based on the Human Protein Atlas.**

## 204 **Data validation**

205 The ELOVL6 protein levels, verified by the HPA database, were all increased,  
206 which was consistent with the mRNA levels in head and neck squamous cell  
207 carcinoma samples (Fig 4B).

## 208 **Discussion**

209 Extension of long-chain fatty acid family member 6 (ELOVL6) is part of a highly  
210 conserved endoplasmic reticulum family involved in long-chain fatty acid formation.  
211 ELOVL6 catalyzes the saturation and elongation of monounsaturated fatty acids.  
212 Dietary polyunsaturated fatty acids may severely inhibit ELOVL6 expression (6).  
213 Moreover, overexpressed ELOVL6 has been found in several cancers, including  
214 non-alcoholic steatohepatitis-related hepatocellular carcinoma (17), squamous cell  
215 carcinoma (18), and breast cancer (19, 20). Phospholipids containing longer acyl  
216 chains are abundant in cancer tissues, and ELOVL6 is the main enzyme responsible  
217 for prolonging fatty acids in cancer(18). This elongation has been detected in  
218 non-alcoholic steatohepatitis (NASH) associated with hepatocellular carcinoma (17).  
219 Moreover, Marien *et al* suggested that inhibition of ELOVL6 might be a potential  
220 treatment for lung squamous cell carcinoma(18). In addition, ELOVL6 overexpression

221 has been associated with axillary lymph node metastasis and short disease-free  
222 survival in breast cancer(19).

223 Our results indicate that the expression of ELOVL6 was related to  
224 clinicopathological factors (grade), survival time, and poor prognosis in patients with  
225 HNSCC. Univariate analysis found that ELOVL6 expression, as a clear-cut variable,  
226 was associated with clinicopathological factors with poor prognosis. Stage, T-phase  
227 N-phase and M-phase, may have an indispensable role in the further progression of  
228 tumors. Univariate and multivariate analysis also showed that ELOVL6 was still  
229 closely related to OS. Patients with high expression of ELOVL6 had a decreased  
230 survival rate, which was consistent with Martin *et al* (21). To sum up, these data  
231 suggest that ELOVL6 may be a potential prognostic biomarker and therapeutic target  
232 for the prognosis of HNSCC; however, further studies are warranted.

233 KEGG pathway analysis indicated that the upregulation of ELOVL6 was mainly  
234 related to fatty acid metabolism, WNT signaling pathway, cell cycle, RNA degradation,  
235 and then controlled the occurrence and development of cancer cells. More and more  
236 studies have shown that cell metabolic disorders are associated with tumor  
237 development(22, 23). Metabolic diseases, such as obesity and diabetes are  
238 associated with increased risk of cancer, including hepatocellular carcinoma, breast,  
239 colon, prostate, and pancreatic cancer(5, 8-10). ELOVL6 is involved in fatty acid  
240 metabolic pathways. Increased generation of new fat is an early and common event in  
241 the development of cancer(24). Lipogenesis is considered as a potential target for

242 cancer therapy. Some enzymes associated with lipogenesis have been reported as  
243 targets for cancer therapy (25).

244 Upregulation of ELOVL6 expression affects WNT signaling pathways critical to  
245 tissue development and homeostasis by regulating their endogenous stem cells. WNT  
246 signaling abnormalities can affect the behavior of cancer stem cells (CSC) and trigger  
247 and/or maintain and develop many cancers (26).

248 ELOVL6 upregulation affects tight junctions. Claudins are integral  
249 transmembrane proteins in tight junctions essential to maintain cell adhesion and  
250 polarity. Changes in individual claudin expression have been detected in cancer and  
251 appear to be associated with tumor progression (27).

252 So far, no association between ELOVL6 and tumor immune response has been  
253 reported. In the present study, we used online tools to analyze the correlation  
254 between immune infiltration in HNSCC and ELOVL6. TIMER database was applied to  
255 analyze the link between ELOVL6 expression and immune infiltration levels in  
256 HNSCC. ELOVL6 had the strongest association with B cells, CD8+T cells, CD4+T  
257 cells, neutrophils, macrophages, and dendritic cells. HNSCC, especially an  
258 oropharyngeal tumor, is a highly immune-infiltrating tumor (28, 29). CD8+ T cells are  
259 the main anticancer effector cell subsets in HNSCC. Their function is often hampered  
260 by overexpression of immune checkpoint molecules such as programmed cell death  
261 protein 1(PD-1), programmed cell death 1 ligand 1(PD-L1), or cytotoxic T  
262 lymphocyte-associated protein 4 (CTLA-4)(30). These molecules have become

263 targets for immunotherapy approaches that alter cancer treatment patterns. At the  
264 same time, lymphocytes B are another critical component of TILs that are associated  
265 with good prognosis in several human cancer types(31). Large numbers of B  
266 lymphocytes in lymph node metastasis are associated with better prognosis in  
267 HNSCC patients (32). In the tumor microenvironment, dendritic cells through blood  
268 circulation and interact with tumor cells in the tumor microenvironment. At different  
269 stages of tumor progression, dendritic cells may exhibit different functions, both as  
270 immune stimulators and as immunosuppressive factors (33). All these suggest that  
271 ELOVL6 may have an important role in tumor immune response and be a good target  
272 for immunotherapy. The association with various tumor characteristics and immune  
273 cell responses highlights the role of ELOVL6 upregulation as an independent  
274 prognostic factor for poor overall survival.

275 HNSCC patients with higher expression of ELOVL6 are more likely to develop  
276 advanced grade tumors compared to those with low expression in patients with  
277 HNSCC. ELOVL6 may affect tumorigenesis mechanism and tumor immunological  
278 progression in HNSCC, which suggests that ELOVL6 has a vital role in tumor immune  
279 response and can be a good target for immunotherapy.

## 280 **Conclusions**

281 To the best of our knowledge, this is the first study that confirmed the importance  
282 of ELOVL6 in the prognosis of HNSCC. However, future clinical trials are needed to  
283 validate these results. With further understanding of its functional scope, ELOVL6

284 may become a useful tool for diagnosing and treating HNSCC and promoting the  
285 application of ELOVL6 in the prognostic evaluation of HNSCC. Moreover, biomarker  
286 therapy may be regarded as a promising option for the treatment of HNSCC.

## 287 **References**

- 288 1. Bray F, Ferlay J, Soerjomataram I, Siegel RL, Torre LA, Jemal A. Global cancer statistics 2018:  
289 GLOBOCAN estimates of incidence and mortality worldwide for 36 cancers in 185 countries. *CA*  
290 *Cancer J Clin*. 2018;68(6):394-424.
- 291 2. Warnakulasuriya S. Global epidemiology of oral and oropharyngeal cancer. *Oral Oncol*.  
292 2009;45(4-5):309-16.
- 293 3. Leemans CR, Braakhuis BJ, Brakenhoff RH. The molecular biology of head and neck cancer. *Nat*  
294 *Rev Cancer*. 2011;11(1):9-22.
- 295 4. Chauhan SS, Kaur J, Kumar M, Matta A, Srivastava G, Alyass A, et al. Prediction of  
296 recurrence-free survival using a protein expression-based risk classifier for head and neck cancer.  
297 *Oncogenesis*. 2015;4:e147.
- 298 5. Su YC, Feng YH, Wu HT, Huang YS, Tung CL, Wu P, et al. Elov16 is a negative clinical predictor  
299 for liver cancer and knockdown of Elov16 reduces murine liver cancer progression. *Sci Rep*.  
300 2018;8(1):6586.
- 301 6. Matsuzaka T, Shimano H, Yahagi N, Yoshikawa T, Amemiya-Kudo M, Hasty AH, et al. Cloning  
302 and characterization of a mammalian fatty acyl-CoA elongase as a lipogenic enzyme regulated by  
303 SREBPs. *J Lipid Res*. 2002;43(6):911-20.

- 304 7. Moon YA, Shah NA, Mohapatra S, Warrington JA, Horton JD. Identification of a mammalian long  
305 chain fatty acyl elongase regulated by sterol regulatory element-binding proteins. *J Biol Chem.*  
306 2001;276(48):45358-66.
- 307 8. Giovannucci E, Harlan DM, Archer MC, Bergenstal RM, Gapstur SM, Habel LA, et al. Diabetes  
308 and cancer: a consensus report. *Diabetes Care.* 2010;33(7):1674-85.
- 309 9. Caan BJ, Coates AO, Slattery ML, Potter JD, Quesenberry CP, Jr., Edwards SM. Body size and  
310 the risk of colon cancer in a large case-control study. *Int J Obes Relat Metab Disord.*  
311 1998;22(2):178-84.
- 312 10. Bianchini F, Kaaks R, Vainio H. Overweight, obesity, and cancer risk. *Lancet Oncol.*  
313 2002;3(9):565-74.
- 314 11. Subramanian A, Tamayo P, Mootha VK, Mukherjee S, Ebert BL, Gillette MA, et al. Gene set  
315 enrichment analysis: a knowledge-based approach for interpreting genome-wide expression profiles.  
316 *Proc Natl Acad Sci U S A.* 2005;102(43):15545-50.
- 317 12. Li T, Fan J, Wang B, Traugh N, Chen Q, Liu JS, et al. TIMER: A Web Server for Comprehensive  
318 Analysis of Tumor-Infiltrating Immune Cells. *Cancer Res.* 2017;77(21):e108-e10.
- 319 13. Li B, Severson E, Pignon JC, Zhao H, Li T, Novak J, et al. Comprehensive analyses of tumor  
320 immunity: implications for cancer immunotherapy. *Genome Biol.* 2016;17(1):174.
- 321 14. Aran D, Sirota M, Butte AJ. Systematic pan-cancer analysis of tumour purity. *Nat Commun.*  
322 2015;6:8971.
- 323 15. Uhlen M, Fagerberg L, Hallstrom BM, Lindskog C, Oksvold P, Mardinoglu A, et al. Proteomics.  
324 Tissue-based map of the human proteome. *Science.* 2015;347(6220):1260419.



- 325 16. Ohtani H. Focus on TILs: prognostic significance of tumor infiltrating lymphocytes in human  
326 colorectal cancer. *Cancer Immun.* 2007;7:4.
- 327 17. Muir K, Hazim A, He Y, Peyressatre M, Kim DY, Song X, et al. Proteomic and lipidomic signatures  
328 of lipid metabolism in NASH-associated hepatocellular carcinoma. *Cancer Res.* 2013;73(15):4722-31.
- 329 18. Marien E, Meister M, Muley T, Gomez Del Pulgar T, Derua R, Spraggins JM, et al. Phospholipid  
330 profiling identifies acyl chain elongation as a ubiquitous trait and potential target for the treatment of  
331 lung squamous cell carcinoma. *Oncotarget.* 2016;7(11):12582-97.
- 332 19. Feng YH, Chen WY, Kuo YH, Tung CL, Tsao CJ, Shiau AL, et al. Elov16 is a poor prognostic  
333 predictor in breast cancer. *Oncol Lett.* 2016;12(1):207-12.
- 334 20. Yamashita Y, Nishiumi S, Kono S, Takao S, Azuma T, Yoshida M. Differences in elongation of  
335 very long chain fatty acids and fatty acid metabolism between triple-negative and hormone  
336 receptor-positive breast cancer. *BMC Cancer.* 2017;17(1):589.
- 337 21. Prusinkiewicz MA, Gameiro SF, Ghasemi F, Dodge MJ, Zeng PYF, Maekebay H, et al.  
338 Survival-Associated Metabolic Genes in Human Papillomavirus-Positive Head and Neck Cancers.  
339 *Cancers (Basel).* 2020;12(1).
- 340 22. Sanchez-Martinez R, Cruz-Gil S, Gomez de Cedron M, Alvarez-Fernandez M, Vargas T, Molina S,  
341 et al. A link between lipid metabolism and epithelial-mesenchymal transition provides a target for colon  
342 cancer therapy. *Oncotarget.* 2015;6(36):38719-36.
- 343 23. Bechmann LP, Hannivoort RA, Gerken G, Hotamisligil GS, Trauner M, Canbay A. The interaction  
344 of hepatic lipid and glucose metabolism in liver diseases. *J Hepatol.* 2012;56(4):952-64.

- 345 24. Migita T, Okabe S, Ikeda K, Igarashi S, Sugawara S, Tomida A, et al. Inhibition of ATP citrate  
346 lyase induces triglyceride accumulation with altered fatty acid composition in cancer cells. *Int J Cancer*.  
347 2014;135(1):37-47.
- 348 25. Guo S, Wang Y, Zhou D, Li Z. Significantly increased monounsaturated lipids relative to  
349 polyunsaturated lipids in six types of cancer microenvironment are observed by mass spectrometry  
350 imaging. *Sci Rep*. 2014;4:5959.
- 351 26. Duchartre Y, Kim YM, Kahn M. The Wnt signaling pathway in cancer. *Crit Rev Oncol Hematol*.  
352 2016;99:141-9.
- 353 27. Lourenco SV, Coutinho-Camillo CM, Buim ME, Pereira CM, Carvalho AL, Kowalski LP, et al. Oral  
354 squamous cell carcinoma: status of tight junction claudins in the different histopathological patterns and  
355 relationship with clinical parameters. A tissue-microarray-based study of 136 cases. *J Clin Pathol*.  
356 2010;63(7):609-14.
- 357 28. Mandal R, Senbabaoglu Y, Desrichard A, Havel JJ, Dalin MG, Riaz N, et al. The head and neck  
358 cancer immune landscape and its immunotherapeutic implications. *JCI Insight*. 2016;1(17):e89829.
- 359 29. Green VL, Michno A, Stafford ND, Greenman J. Increased prevalence of tumour infiltrating  
360 immune cells in oropharyngeal tumours in comparison to other subsites: relationship to peripheral  
361 immunity. *Cancer Immunol Immunother*. 2013;62(5):863-73.
- 362 30. Wherry EJ, Kurachi M. Molecular and cellular insights into T cell exhaustion. *Nat Rev Immunol*.  
363 2015;15(8):486-99.
- 364 31. Nelson BH. CD20+ B cells: the other tumor-infiltrating lymphocytes. *J Immunol*.  
365 2010;185(9):4977-82.

- 366 32. Pretscher D, Distel LV, Grabenbauer GG, Wittlinger M, Buettner M, Niedobitek G. Distribution of  
367 immune cells in head and neck cancer: CD8+ T-cells and CD20+ B-cells in metastatic lymph nodes are  
368 associated with favourable outcome in patients with oro- and hypopharyngeal carcinoma. *BMC Cancer*.  
369 2009;9:292.
- 370 33. Engelhardt JJ, Boldajipour B, Beemiller P, Pandurangi P, Sorensen C, Werb Z, et al. Marginating  
371 dendritic cells of the tumor microenvironment cross-present tumor antigens and stably engage  
372 tumor-specific T cells. *Cancer Cell*. 2012;21(3):402-17.

**A**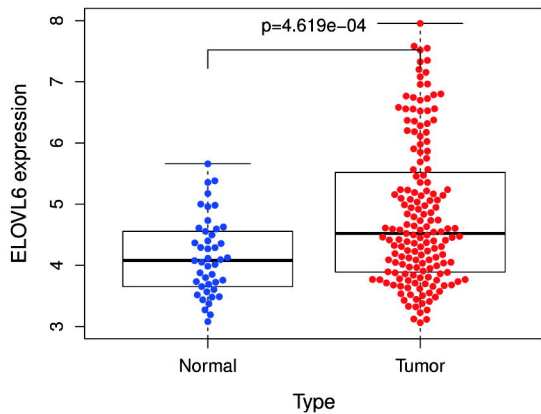**B**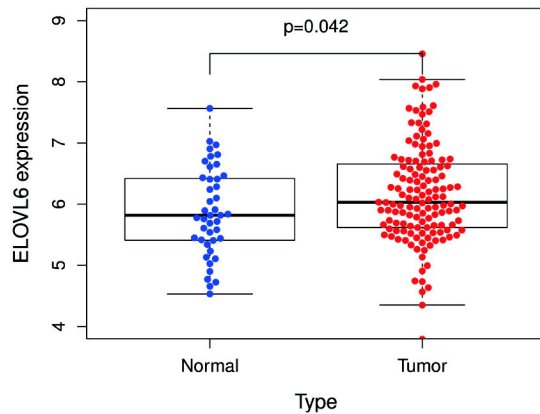**C****ELOVL6(p=0.008)**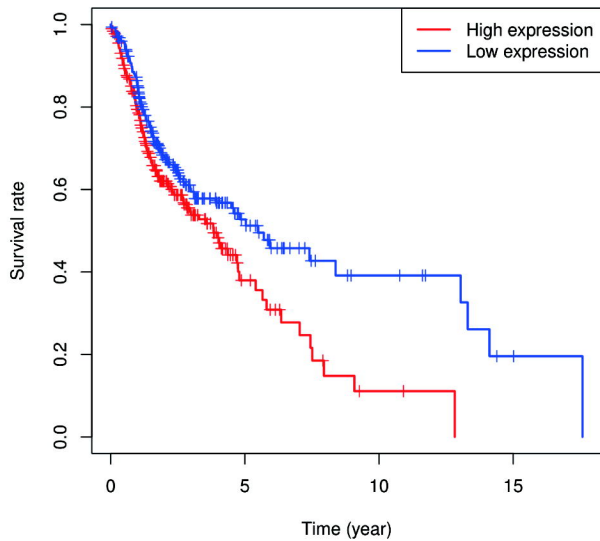**D**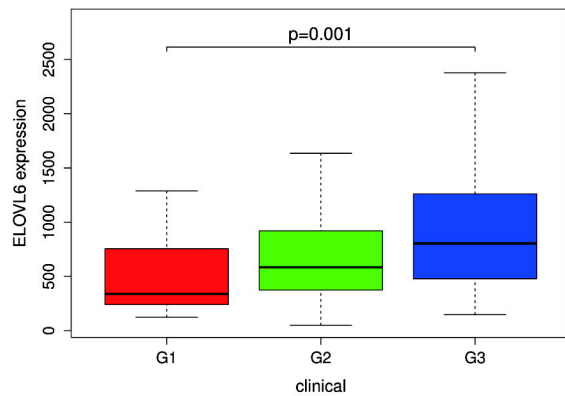

# Hazard ratio

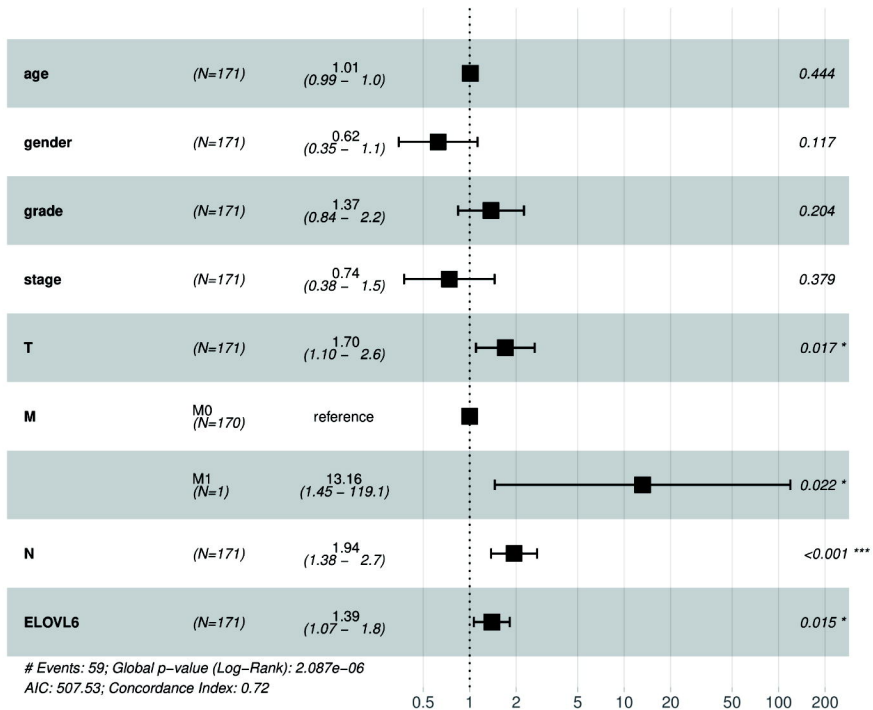

# Events: 59; Global p-value (Log-Rank): 2.087e-06

AIC: 507.53; Concordance Index: 0.72

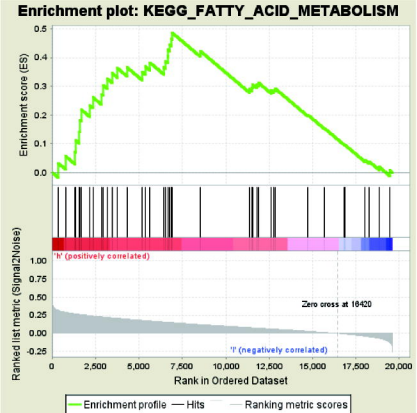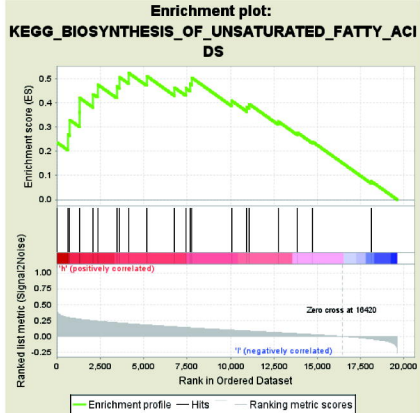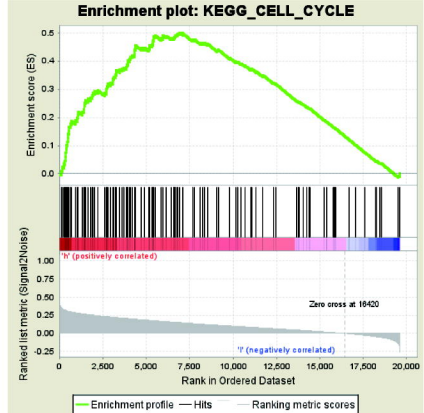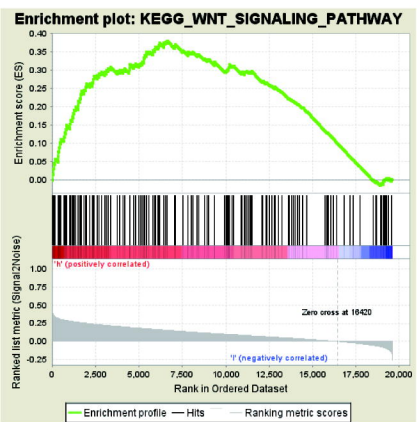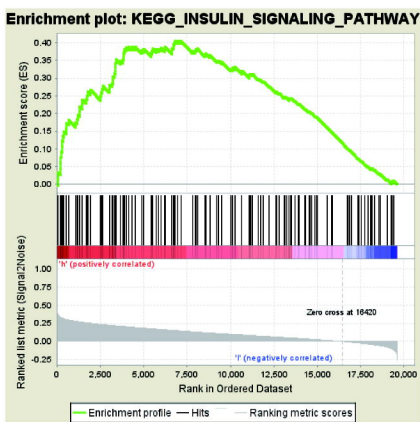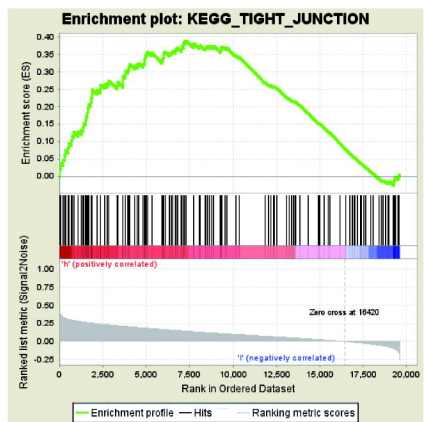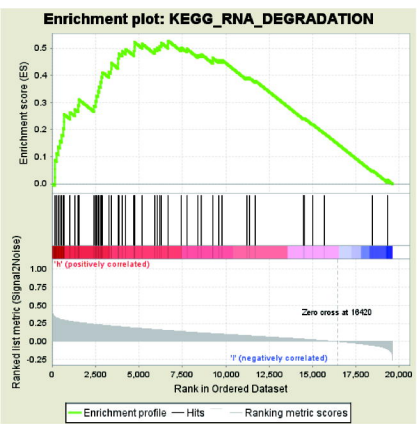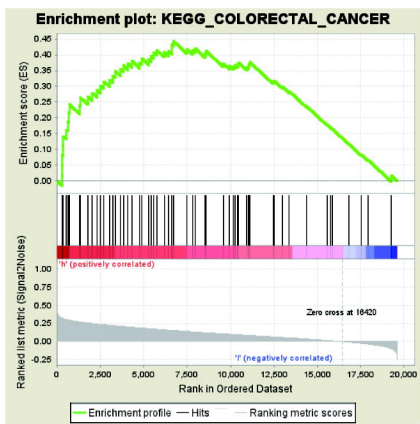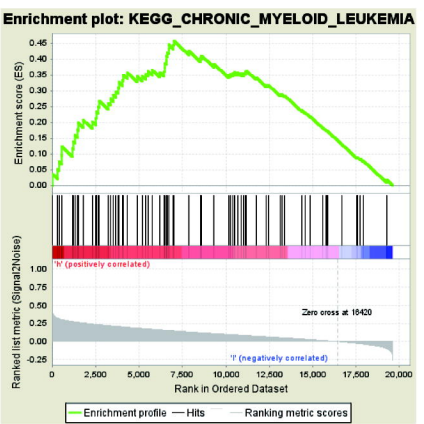

**A**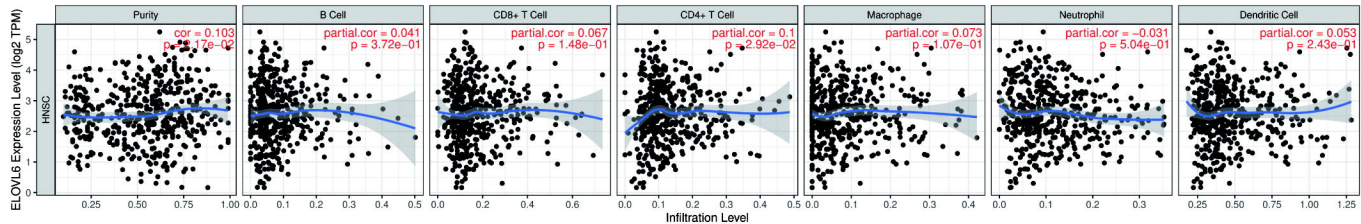**B**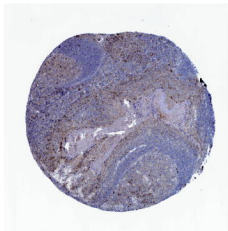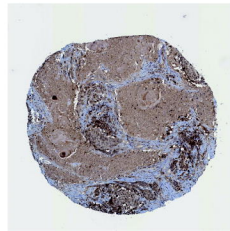

Source: https://www.biorxiv.org/content/10.1101/2021.02.13.431065v1.full.pdf
